1 **GPR183 mediates the capacity of the novel CD47-CD19 bispecific**  
2 **antibody TG-1801 to heighten ublituximab-umbralisib (U2) anti-lymphoma**  
3 **activity**

4

5 Marcelo Lima Ribeiro,<sup>1,2\*</sup> Núria Profitós-Pelejà,<sup>1\*</sup> Juliana Carvalho Santos,<sup>1\*</sup>  
6 Pedro Bleuca,<sup>3</sup> Diana Reyes Garau,<sup>1</sup> Marc Armengol,<sup>1;4</sup> Miranda Fernández-  
7 Serrano,<sup>1;4</sup> Hari P. Miskin,<sup>5</sup> Francesc Bosch,<sup>4;6;7</sup> Manel Esteller,<sup>3;8;9</sup> Emmanuel  
8 Normant,<sup>5</sup> and Gael Roué<sup>1;4;6;7</sup>

9

10 <sup>1</sup>Lymphoma Translational Group and <sup>3</sup>Cancer Epigenetics Group, Josep  
11 Carreras Leukemia Research Institute, Badalona, Spain; <sup>2</sup>Laboratory of  
12 Immunopharmacology and Molecular Biology, Sao Francisco University Medical  
13 School, Braganca Paulista, São Paulo, Brazil; <sup>4</sup>Autonomous University of  
14 Barcelona, Barcelona, Spain; <sup>5</sup>TG Therapeutics, New York, NY, USA;  
15 <sup>6</sup>Department of Hematology, Vall d'Hebron University Hospital, Barcelona,  
16 Spain; <sup>7</sup>Experimental Hematology, Vall d'Hebron Institute of Oncology,  
17 Barcelona, Spain; <sup>8</sup>Centro de Investigación Biomédica en Red de Cáncer  
18 (CIBERONC), Instituto de Salud Carlos III, Barcelona, Spain; <sup>9</sup>Institució  
19 Catalana de Recerca i Estudis Avançats (ICREA), Barcelona, Spain.

20

21 \* MLR, NPP and JCS contributed equally to this work.

22

23 **Corresponding authors:** Marcelo L. Ribeiro, PhD. Lymphoma Translational  
24 Group, IJC. Ctra de Can Ruti, Camí de les Escoles s/n, 08916 Badalona  
25 (Barcelona), SPAIN. Tel: (+34) 93 5572800 Ext. 4081. E-mail:

26 [mlima@carreresresearch.org](mailto:mlima@carreresresearch.org); Emmanuel Normant, Pharm.D., PhD., Vice  
27 president preclinical sciences, TG Therapeutics, 2 Gansevoort street, New  
28 York, NY, 10014, USA, Tel: 1-781-813-9481. E-mail: [enormant@tgtxinc.com](mailto:enormant@tgtxinc.com).

29

### 30 **Abstract**

31 Targeted therapies have considerably improved the survival rate of B-cell non-  
32 Hodgkin lymphoma (B-NHL) patients in the last decade; however, most  
33 subtypes remain incurable. TG-1801, a bispecific antibody that targets CD47  
34 selectively on CD19+ B-cells, is under clinical evaluation in relapsed/refractory  
35 B-NHL patients either as a single-agent or in combination with ublituximab, a  
36 CD20 antibody, which is also being combined with the PI3K $\delta$ /CK1e inhibitor,  
37 umbralisib ("U2"-regimen). In this study, we demonstrated that TG-1801  
38 potentiates ublituximab-mediated antibody-dependent cell death (ADCC) and  
39 antibody-dependent cell phagocytosis (ADCP), leading to an additive anti-  
40 tumour effect of the TG-1801/U2 combination in B-NHL co-cultures.  
41 Accordingly, in a B-NHL xenotransplant model, the triplet achieved a 93%  
42 tumour growth inhibition, with 40% of the animals remaining tumour-free 35  
43 days after the last dosing. Transcriptomic analysis further uncovered the  
44 upregulation of the G protein-coupled receptor, GPR183, as a crucial event  
45 associated with TG-1801/U2 synergism, while pharmacological blockade or  
46 genetic depletion of this factor impaired ADCP initiation, as well as cytoskeleton  
47 remodelling and cell migration, in B-NHL cultures exposed to the drug  
48 combination. Thus, our results set the preclinical rationale and support a  
49 combination strategy of TG-1801 with PI3K $\delta$ - and CD20-targeting agents in  
50 patients with B-NHL.

51

## 52 **Introduction**

53 Cluster of differentiation 47 (CD47), also known as integrin-associated protein  
54 (IAP), is a cell surface receptor that is part of the immunoglobulin superfamily  
55 and interacts with the macrophage receptor signal regulatory protein-alpha  
56 (SIRP $\alpha$ ). This interaction sends a “do-not-eat-me” signal to macrophages, which  
57 mediates immune evasion in several types of cancers (Barclay and Van den  
58 Berg, 2014). High levels of CD47 have been observed in both lymphoid and  
59 myeloid neoplasm in which this factor is both an adverse prognostic indicator  
60 and a valid anti-cancer target with several therapeutic antibodies currently being  
61 tested in clinical trials. In B-cell lymphoma, these trials frequently involve a  
62 combination with an anti-CD20 therapy, to ensure a proper engagement of the  
63 Fc receptors at the surface of macrophages and natural killer (NK) effector  
64 cells. The anti-CD20 mAb rituximab has been the most common IgG1 antibody  
65 tested in this setting, and has demonstrated combinatorial activity in both  
66 indolent and aggressive B-cell lymphomas (Armengol et al., 2021; Matlung et  
67 al., 2017). However, as CD47 is widely expressed on the surface of a broad  
68 range of cell types, including erythrocytes and platelets, a major limitation of  
69 CD47 blocking agents is the target-mediated drug disposition and the potential  
70 side effects, which include anaemia or thrombocytopenia.

71 TG-1801 is a novel bi-specific antibody that binds to CD47 with sub-micromolar  
72 affinity and to CD19 with a sub-nanomolar affinity. This thousand-fold difference  
73 between its affinity to CD19 and CD47 allows TG-1801 to bind selectively to  
74 CD19-positive B cells but not CD19-negative red blood cells or platelets  
75 (Buatois et al., 2018; Hatterer et al., 2020). TG-1801 is currently being tested

76 clinically as a single agent and in combination with the glyco-engineered CD20  
77 antibody ublituximab in patients with relapsed/refractory B-cell lymphoma.  
78 Ublituximab, in association with the dual PI3K $\delta$ /CK1 $\epsilon$  inhibitor umbralisib (a  
79 combination named U2), has demonstrated clinical activity in B-cell lymphoma,  
80 and a biologic license application for U2 in chronic lymphocytic leukaemia (CLL)  
81 has been recently accepted for review by the FDA (Lunning et al., 2019). Here  
82 we studied the triplet combination of TG-1801 and U2 in *in vitro* and *in vivo*  
83 models of aggressive B-cell lymphoma.

84

## 85 **Results and Discussion**

### 86 **CD47 blockade in CD19+ cells potentiates the anti-tumour effect of U2** 87 **regimen**

88 To determine the working concentrations of TG-1801 *in vitro*, we first developed  
89 a CD47 occupancy assay using the Burkitt lymphoma (BL) cell line Raji. In this  
90 assay, TG-1801 reached a plateau of 48% CD47 occupancy at a dose as low  
91 as 20 ng/mL, slightly lower than the 67% occupancy achieved by the first-in-  
92 class CD47 blocking mAb, B6H12 (Mateo et al., 1999) (Figure 1A). This  
93 difference may potentially be explained by the lower level of expression of  
94 CD19 compared to CD47 in the BL cell line (Figure 1 - figure supplement 1). As  
95 expected, TG-1801, but not B6H12-mediated target occupancy, was highly  
96 dependent on CD19 expression, as shown in the T-ALL-derived, CD19  
97 negative, Jurkat cells, where no significant CD47 occupancy was detected with  
98 TG-1801 at doses as high as 2  $\mu$ g/mL, contrasting with the sustained binding of  
99 B6H12 (Figure 1A). A panel of human B-cell lymphoma cell lines (n=10) with  
100 different levels of CD47 and CD19 expression, were cultured in the presence of

101 M1-polarized primary macrophages or primary circulating PBMCs from healthy  
102 donors as a source of effector cells, to assess the TG-1801 antibody-dependent  
103 cell phagocytosis (ADCP) or antibody-dependent cell cytotoxicity (ADCC),  
104 respectively. As shown in Figure 1 - figure supplement 2, ADCP and ADCC  
105 were both increased 2-6 fold after CD47 ligation in these cells, and both  
106 appeared to be related to neither the expression levels of CD47 nor the  
107 CD47/CD19 ratios, in accordance with previous reports (Buatois et al., 2018).  
108 Interestingly, the analysis of the pro-cytotoxic or pro-phagocytic activities of the  
109 triplet regimen in five representative B-NHL cell lines, including two DLBCL  
110 (Pfeiffer and Karpas-422), two BL (Raji and Daudi), and one FL (RL), showed  
111 an improvement in these activities when compared to the TG-1801 single-agent  
112 treatment (Figure 1B). In line with this observation, in Raji tumour-bearing mice,  
113 all molecules were active as single agents (88%, 76% and 50% tumour growth  
114 inhibition (TGI) with ublituximab, TG-1801 or umbralisib, respectively, Figure 1 -  
115 figure supplement 3), and the activity of the triplet was higher (93% TGI) after a  
116 17-day treatment. Furthermore, 40% of the mice remained tumour-free 35 days  
117 after the last dose in the triplet arm with no detectable toxicity (Figures 1C and  
118 1D, and data not shown). These *in vitro* and *in vivo* data suggested that the  
119 addition of TG-1801 to the U2 combination induced a mechanism that promoted  
120 a stronger innate immune response.

121

## Figure 1

**A**

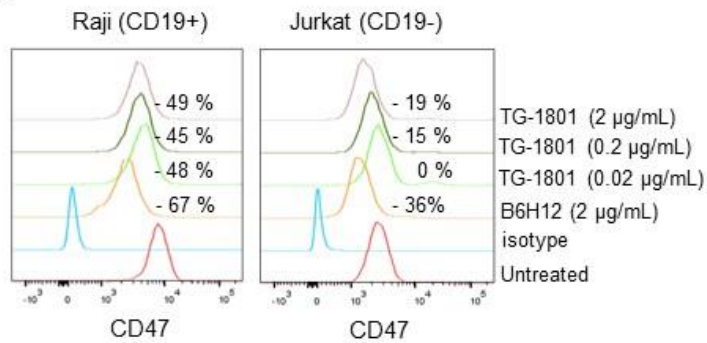

**B**

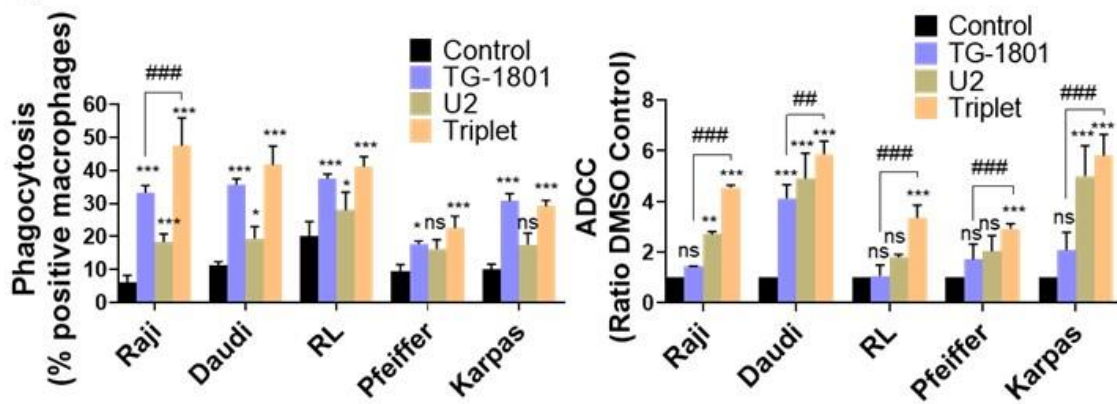

**C**

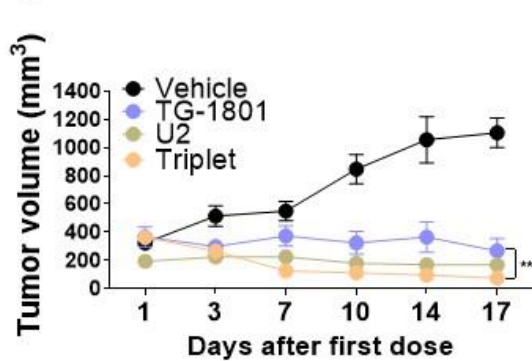

**D**

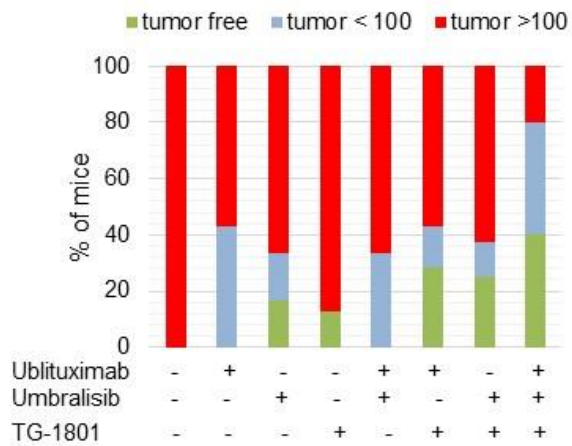

122

123

124 **Figure 1. U2 regimen cooperates with CD47 blockade in *in vitro* and *in***  
125 ***vivo* models of B-cell lymphoma.** A) FACS-mediated CD47 occupancy assay  
126 in the CD19+ Burkitt lymphoma cell line Raji, and in the CD19- T-ALL cells  
127 Jurkat. Results showed a CD19-dependent, optimal competition of 20 ng/mL  
128 TG-1801 with the PE-labelled anti-CD47 antibody (N=3). B) ADCP (left panel)  
129 and ADCC (right panel) activities were assessed in five representative B-cell  
130 lymphoma cell lines (N=3). Values are expressed as mean  $\pm$  SD. C) TG-1801,  
131 U2 and the triplet combination were dosed orally in the Raji xenograft model. D)  
132 Mice with no tumour or low tumour size were kept alive for another 35 days. At  
133 day 52 all the mice either tumour-free (green) or bearing a small tumour (blue, <  
134 100 mm<sup>3</sup>) were alive. The TG-1801-U2 combo group showed an increased  
135 number of tumour free or low tumour burden bearing mice (green and blue  
136 bars). \*  $p < 0.05$ , \*\*  $p < 0.01$ , \*\*\*  $p < 0.001$ , when compared to control group. (N= 8-  
137 6 mice per group) ####  $p < 0.001$  when compared to TG-1801 alone. ns = non-  
138 significant.

139

#### 140 **GPR183 is upregulated in response to TG-1801/U2 combination treatment**

141 To uncover the mechanisms underlying the superior effect of the triplet,  
142 transcriptomic analyses were carried out on a set of six samples that included  
143 Raji xenograft tumours (n=2) and CD20+ cells isolated from Raji, Daudi and two  
144 BL primary samples co-cultured with the bone marrow-derived stromal cell line  
145 (BMSC) stromaNKtert (Dlouhy et al., 2020), M2-polarized primary  
146 macrophages, primary circulating PBMCs, and either TG-1801 or the TG-  
147 1801+U2 triplet. As shown in Figure 2A, a total of 20 genes were significantly  
148 up- or down-regulated in the triplet compared to TG-1801 treatment in all six

149 samples. A Gene Set Enrichment Analysis (GSEA) identified inflammatory  
150 (NES = 2.43, FDR = 0) and TNF $\alpha$ -driven signatures (NES = 2.43, FDR = 0) as  
151 predominantly activated upon treatment with the triple combination, when  
152 compared to TG-1801 single agent therapy, suggesting that the stronger activity  
153 of the triplet was based on the activation of an immune-related anti-tumour  
154 effect. In the heatmap showing a set of genes strongly activated in all six  
155 samples after the triplet treatment (Figure 2B), the highest up-regulated gene in  
156 both signatures was the G protein-coupled receptor 183 (GPR183, also known  
157 as Epstein-Barr virus (EBV)-induced G protein-coupled receptor 2, EBI2).  
158 GPR183 was also one of the 20 upregulated genes previously identified in the  
159 volcano plot (Figure 2A). An increase in GPR183 expression after U2 addition  
160 to TG-1801 was confirmed *in vitro* by qPCR analysis in the four cell lines-  
161 derived samples (Figures 2C and 2D), by western blot in the Raji and Daudi cell  
162 lines (Figure 2E and source data 1), and by immunohistochemistry (IHC) in  
163 tumour specimen from the Raji xenograft model (Figure 2F). GPR183 was first  
164 identified by sequence similarity as a GPCR induced by EBV infection. This pro-  
165 inflammatory receptor, which upregulation is associated with a better prognosis  
166 of DLBCL patients treated with the standard immunochemotherapeutic (R-  
167 CHOP) regimen according to published gene array database (gse10846; R2:  
168 Genomics Analysis and Visualization Platform (<http://r2.amc.nl>  
169 <http://r2platform.com>)), plays an important role in B-cell motility and positioning  
170 during the germinal centre reaction (Liu et al., 2011; Pereira et al., 2009), and  
171 the gradient of its natural ligand, oxysterol, acts as a chemoattractant of  
172 GPR183+ cells. Accordingly, among a panel of eight genes identified besides  
173 GPR183 in the two inflammation gene signatures, the transcript of the sole



174 chemoattractant gene *CCL20* was upregulated by the triple combination in the  
175 three *in vitro* and *in vivo* models (Figures 2C and 2D). Also, increased tumour  
176 infiltration of mouse macrophages (F4/80 IHC staining) together with a  
177 reduction in mitotic index (histone H3-pSer10 IHC staining) were observed in  
178 triplet-treated tumours when compared to either TG-1801 or U2 arms (Figure  
179 2F).

180

## Figure 2

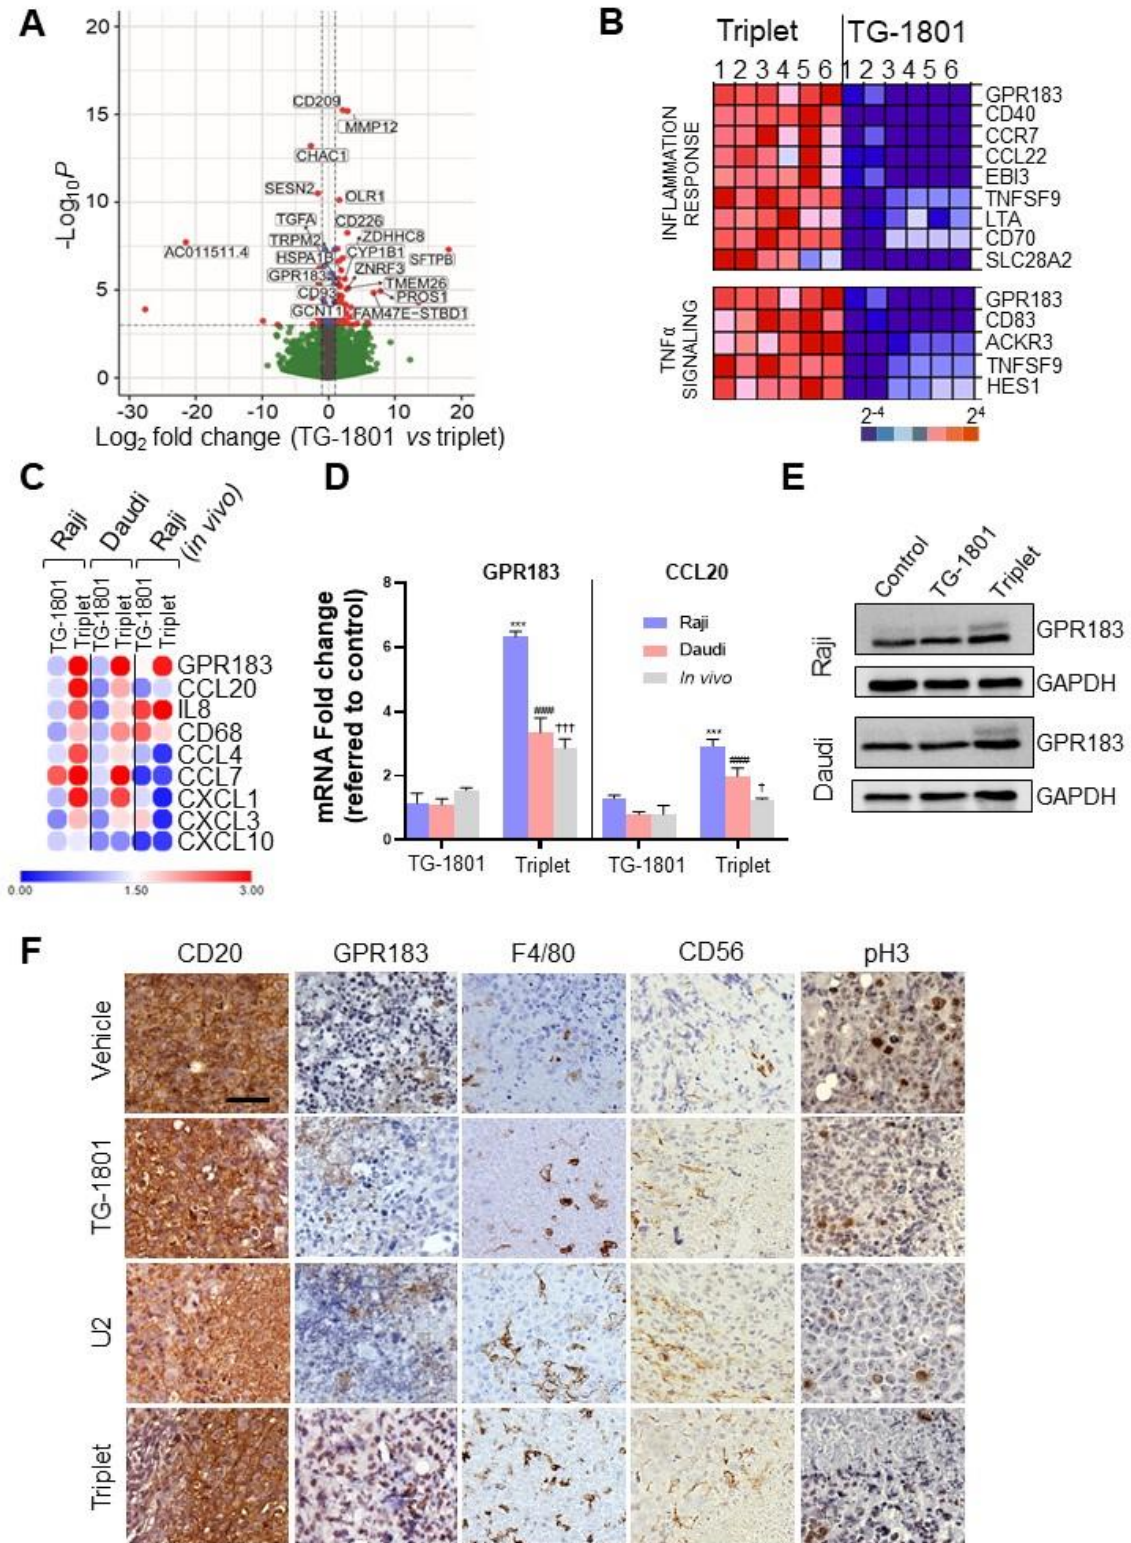

181

182

183 **Figure 2. Upregulation of GPR183 is a hallmark of the response to U2 and**  
184 **TG-1801 combination *in vitro* and *in vivo*.** A) Volcano plot showing the most  
185 relevant significantly differentially expressed genes between triplet and TG-  
186 1801 treatments. Genes that underwent the same modulation in the three *in*  
187 *vitro* and *in vivo* models (N=20) have been labelled. B) Gene set enrichment  
188 analysis was performed using the GSEA software to analyse the enriched gene  
189 sets in the triplet samples compared to the samples treated with TG-1801.  
190 Samples were sorted from left to right: 1-Raji, 2-Daudi, 3-4- BL primary samples  
191 and 5-6 CD20+ cells isolated from 2 representative Raji xenograft specimens.  
192 C) GPR183 upregulation was confirmed in these samples and compared to the  
193 11 inflammatory genes extracted from GSEA analysis. Data are presented in  
194 fold-change related to the control (N=3). Clustering was performed using  
195 Morpheus (hierarchical, one minus Pearson correlation) available at  
196 <https://software.broadinstitute.org/morpheus/>. D) *GPR183* and *CCL20* transcript  
197 levels followed the same evolution *in vitro* and *in vivo* according to the different  
198 treatment regimens. E) Immunoblot evaluation of GPR183 (SantaCruz, #sc-  
199 514342) in both Raji and Daudi showed an increased GPR183 protein  
200 expression after the combination treatment (N=3). F) Immunohistochemistry  
201 (IHC) labelling of CD20 (Clone L26, Sigma-Aldrich), GPR183 (Clone G-12,  
202 Santa Cruz), F4/80 (Clone SP115, Abcam), Histone H3-pSer10 (Clone E173,  
203 Abcam) and CD56/NCAM-1 (Clone EPR1827, Abcam) in tissue sections from  
204 tumour specimens (N=3). \*\*\*  $p < 0.001$ , ####  $p < 0.001$ , and †  $p < 0.05$  and †††  
205  $p < 0.001$  when compared to control group in Raji (*in vitro*), Daudi (*in vitro*) and  
206 Raji (*in vivo*) models, respectively. ns = non-significant.  
207 Figure 2E — source data 1 - raw unedited blot.

208 **GPR183 is required for B-cell trafficking and macrophage-dependent**  
209 **phagocytosis after triple combination treatment**

210 To investigate how the upregulation of GPR183 in target cells could impact their  
211 recognition and phagocytosis by M1 macrophages, a single-clone derived Raji-  
212 GPR183<sup>KO</sup> cell was generated by CRISPR/Cas9 gene editing (Figure 3A and  
213 source data 1), using previously described procedures (Ribeiro et al., 2021) and  
214 co-cultured for 24h with primary M1 macrophages and BMSCs under  
215 Nanoshuttle-driven magnetic levitation (Souza et al., 2010) in a conditioned  
216 medium to form functional 3D spheroids. Compared to the Raji-GPR183<sup>wt</sup>, the  
217 Raji-GPR183<sup>KO</sup> spheroids harboured a complete blockade of M1 cell infiltration  
218 within the multicellular aggregates, both at basal levels and upon treatment with  
219 the triplet (Figure 3B). Accordingly, ADCP activity was abrogated in the Raji-  
220 GPR183<sup>KO</sup> cell cultures (Figure 3C) highlighting the critical role of GPR183 in  
221 the recruitment of macrophages. ADCC was also compromised, although to a  
222 lower extent (Figure 3C). Supporting these results, global inflammatory  
223 signature, and especially *CCL20* gene overexpression, were not detected  
224 anymore in Raji-GPR183<sup>KO</sup> co-cultures exposed to triplet therapy (Figure 3D).

225 To understand whether a functional GPR183 was required for the TG-1801+U2  
226 synergistic interaction, Raji cells were exposed for 1h to the GPR183 inhibitor  
227 NIBR189 (Gessier et al., 2014), washed out, and co-cultured for 3h with M1-  
228 polarized macrophages, in the presence of U2 +/- TG-1801. As shown in Figure  
229 3E, relative ADCP was decreased by 3-fold after GPR183 pharmacological  
230 blockade, when compared to untreated Raji cells.

231 Since GPR183 is a known antagonist of chemokine-mediated B cell migration  
232 (Barroso et al., 2012), a transwell migration assay using recombinant CXCL12

233 as a chemoattractant was set up, to compare the Raji parental to the Raji-  
234 GPR183<sup>KO</sup> cells and to NIBR189-pretreated cells. Figure 3F shows that cell  
235 migration was significantly impaired by both U2 and TG-1801 treatments, and  
236 that the combination of the two drugs led to an accentuated inhibition. This  
237 effect was completely lost either after GPR183 pharmacological inhibition by  
238 NIBR189 or after the genetic deletion of the receptor. Accordingly, F-actin  
239 polymerization was decreased by 70% in Raji cells exposed to the triplet  
240 treatment and this effect was completely lost in the absence of GPR183 or after  
241 NIBR189 treatment (Figures 3G and 3H), in agreement with previous studies  
242 that highlighted the relevance of F-actin disruption in target cells in the anti-  
243 lymphoma effect of anti-CD47 antibodies (Barbier et al., 2009).

244

245 While the synergistic anti-tumour effect of CD47-targeting drugs, when  
246 combined with IgG1 antibodies, has classically been related to the inhibition of  
247 the “do-not-eat-me” signal, here we propose a novel and additional mechanism  
248 based on the overexpression of the proinflammatory receptor GPR183. Our  
249 results support a role for GPR183 in the recognition and elimination *in vitro* and  
250 *in vivo* of tumour B cells by activated macrophages (Figure 3I). Future studies  
251 will be aimed at understanding whether GPR183 could be a biomarker for the  
252 activity of therapeutic combinations containing CD47 targeted therapy. Testing  
253 whether this discovery can be generalized to other drugs from the same families  
254 is underway.

255

256

## Figure 3

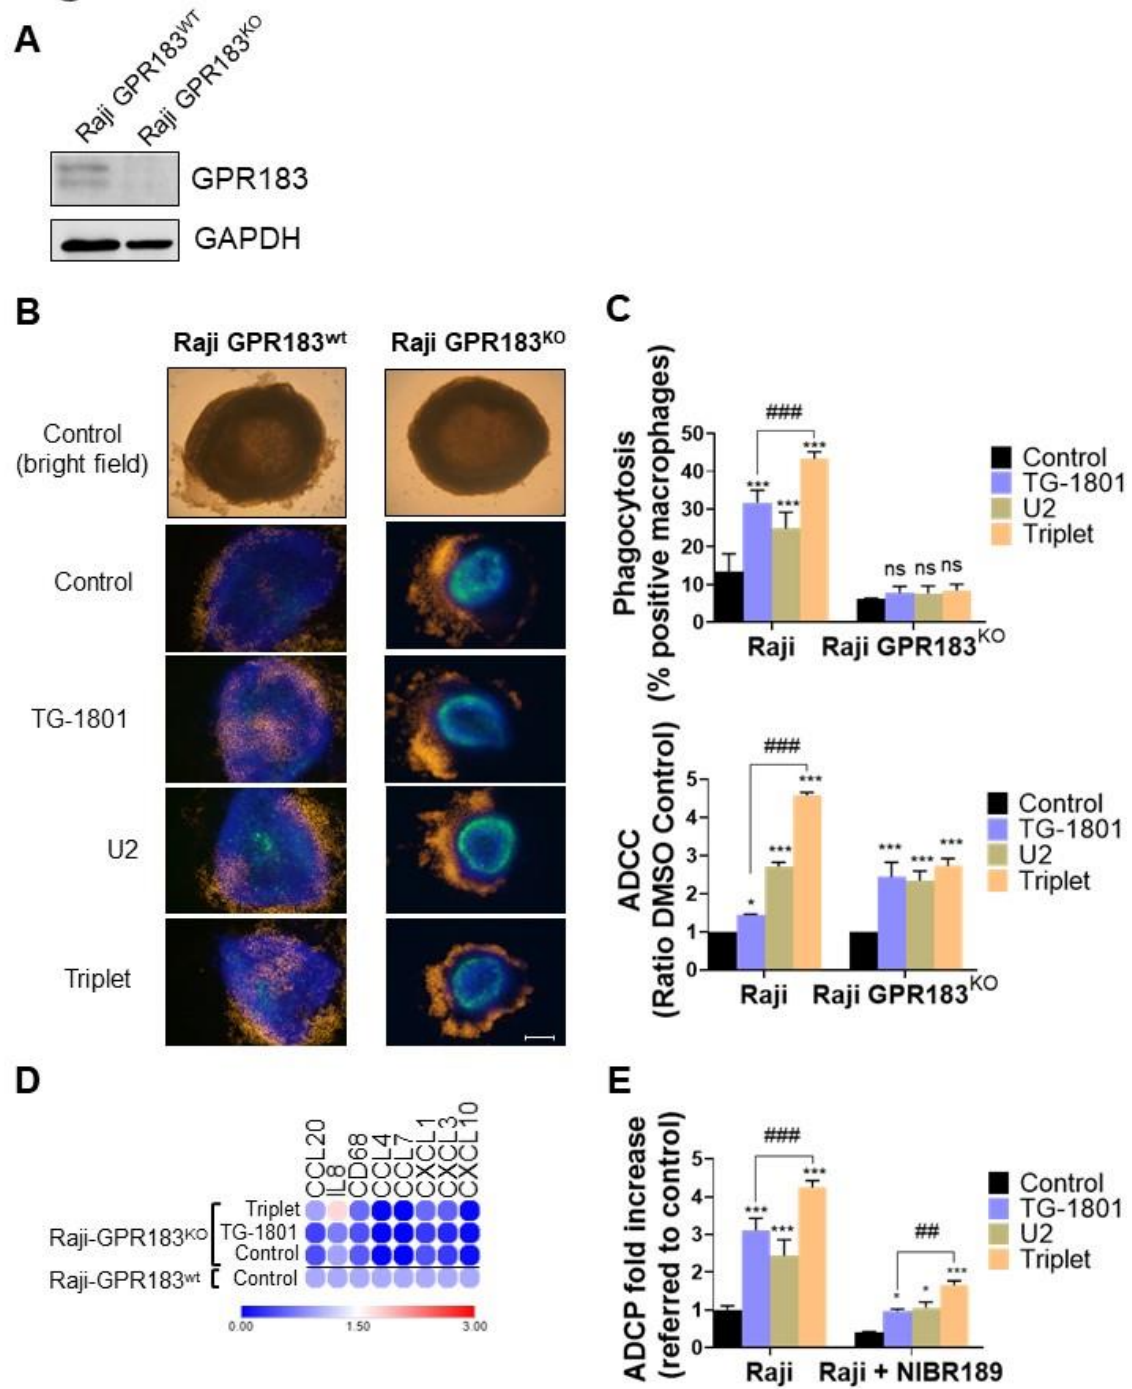

257

258

259

## Figure 3 (cont.)

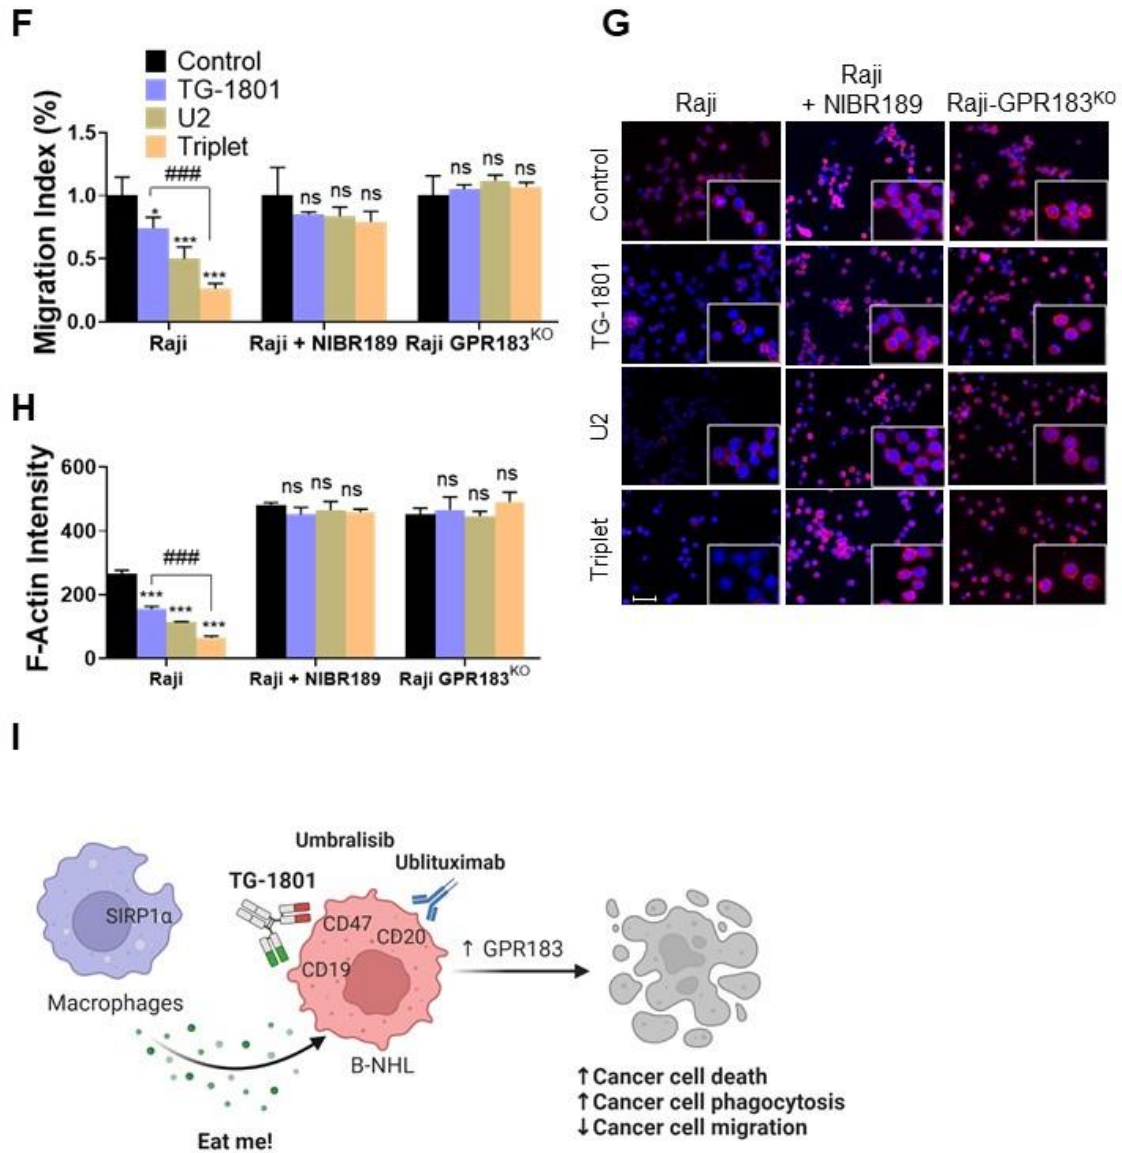

260

261 **Figure 3. GPR183 activity is required to impair B cell trafficking and to**

262 **potentiate macrophage-dependent phagocytosis in triplet-treated cells. A)**

263 Immunoblot evaluation of GPR183 in both Raji-GPR183<sup>WT</sup> and Raji-GPR183<sup>KO</sup>

264 cells. B) Raji-GPR183<sup>WT</sup> or Raji-GPR183<sup>KO</sup> 3D spheroid in presence or absence

265 of 10 ng/mL TG-1801 +/- U2 (10 µg/mL ublituximab + 1 µM umbralisib) for one

266 more day. The infiltration of M1 macrophages was evaluated by live-cell red

267 fluorescence (N=3). Scale bar: 500  $\mu$ m. C) The phagocytosis and cytotoxicity  
268 rates were assessed in Raji-GPR183<sup>WT</sup> and Raji-GPR183<sup>KO</sup> cultures with  
269 pHrodo-stained B cells (top graph) and ADCC (bottom graph), as previously  
270 described (N=3). D) Raji-GPR183<sup>WT</sup> and Raji-GPR183<sup>KO</sup> were co-cultured with  
271 BMSCs, M2-polarized primary macrophages and PBMCs (4:1:1:1) and treated  
272 with vehicle, TG-1801 or the triplet combination for 24h. Then, purified CD20+  
273 cells were subjected to RNA extraction and qPCR. Data are presented in fold-  
274 change related to the Raji-GPR183<sup>WT</sup> control (N=3). E) ADCP activities were  
275 assessed in Raji cells with or without the GPR183 inhibitor NIBR189 prior to  
276 treatment with 10 ng/mL TG-1801 +/- U2 combo (N=3). F) The cell migration  
277 index of Raji-GPR183<sup>WT</sup>, Raji-GPR183<sup>KO</sup> cells exposed to the GPR183 inhibitor  
278 NIBR189, in presence or absence of 10 ng/mL TG-1801 +/- U2 combination  
279 (N=3). G) F-actin levels were assessed in the different cultures exposed to TG-  
280 1801 +/- U2 as in E), followed by staining with a TRITC-labelled phalloidin and  
281 direct red fluorescence recording. Nuclei were counterstained with DAPI (blue)  
282 (N=3). Scale bar: 50  $\mu$ m. H) F-actin fluorescence intensity from Raji-GPR183<sup>WT</sup>,  
283 Raji-GPR183<sup>KO</sup>, and NIBR189-treated Raji cells in presence or absence of TG-  
284 1801 +/- U2 (N=3). Values are expressed as mean  $\pm$  SD. \*  $p < 0.05$ , \*\*  $p < 0.01$ ,  
285 \*\*\*  $p < 0.001$ , when compared to control group. ##  $p < 0.01$  and ###  $p < 0.001$  when  
286 compared to TG-1801 alone. ns = non-significant. I) Mechanism of action of the  
287 TG-1801/U2 triplet combination therapy in B-NHL. The novel CD47-CD19  
288 bispecific antibody potentiates the anti-tumour activity of the ublituximab-  
289 umbralisib regimen through activation of the pro-inflammatory GPR183, thus  
290 promoting macrophage-dependent phagocytosis, B-cell cytoskeleton  
291 remodelling and B-cell motility.



292 Figure 3A—source data 1 - raw unedited blot.

293

294

## 295 **Materials and Methods**

### 296 **Cell lines**

297 Five DLBCL (Pfeiffer, TMD-8, HBL-1, SUDHL-5, Karpas-422), three Burkitt  
298 lymphoma (Raji, Daudi, Ramos), two Follicular lymphomas (DOHH-2, RL), and  
299 one T-cell Acute Lymphoblastic Leukemia (Jurkat) cell lines used in this study  
300 were grown in Advanced-RMPI 1640 supplemented with 5% heat-inactivated  
301 FBS, 2 mmol/L glutamine, 50 µg/mL penicillin-streptomycin (Thermo Fisher,  
302 MA, USA).

303

### 304 **Occupancy assay**

305 Cytofluorimetric quantification of CD47 and CD19 levels in a panel of 10 B-NHL  
306 cell lines. Cells were stained with PE-labelled anti-CD47 or anti-CD19  
307 antibodies (Becton Dickinson) and the absolute number of membrane-bound  
308 molecules of CD47 or CD19 was estimated using QuantiBRITE PE beads (BD  
309 Biosciences) on a FACSCanto II (Becton Dickinson). Data were analysed using  
310 FlowJo software package.

311 For the detection of surface CD47, Raji (CD19+), or Jurkat (CD19-) cells were  
312 stained with a phycoerythrin (PE)-labelled anti-CD47 (B6H12 clone) or isotype  
313 control antibody (BD Biosciences). The cells were pre-treated for 1 h with TG-  
314 1801 or an anti-human CD47 (B6H12 clone) control antibody. For quantification,  
315 a total of 10,000 events were acquired on a FACSCanto II (Becton Dickinson).  
316 Relative median fluorescence intensity (MFI) was calculated using FlowJo

317 software package as the ratio between CD47 and control signal intensity.  
318 Shown are the percentages of occupancy, defined as the decreases in CD47  
319 MFI ratios evoked by anti-CD47-treatment, using untreated cells as a calibrator.  
320 B6H12 clone was used as a CD19-independent positive control of CD47  
321 occupancy.

322

323 **Peripheral blood mononuclear cells isolation and macrophage**  
324 **polarization.**

325 Peripheral blood mononuclear cells (PBMCs) were purified by standard Ficoll-  
326 Hypaque (GE Healthcare, UK) gradient centrifugation from buffy coats of  
327 human healthy donors and cultured freshly in Advanced-RMPI 1640  
328 supplemented with 5% heat-inactivated FBS, 2 mmol/L glutamine, 50 µg/mL  
329 penicillin-streptomycin (Thermo Fisher, MA, USA).

330 RosetteSep™ Human Monocyte Enrichment Cocktail (Stemcell Technologies,  
331 Canada) was used to purify human monocytes from buffy coats following  
332 manufacturer specifications. For M1 or M2 macrophage polarization, the  
333 selected monocytes were cultured in complete Advanced-RMPI 1640  
334 supplemented with either 20 ng/mL human GM-CSF (PeproTech, RockyHill,  
335 NJ), for M1 differentiation, or 20 ng/mL human M-CSF (PeproTech), for M2  
336 differentiation, and incubated for 6 days. On day 6 M0 macrophages were  
337 activated with 100 ng/mL human IFN-γ (PeproTech) and 50 ng/mL LPS, for M1  
338 macrophage polarization for 24 h.

339

340

341

342 **Antibody-dependent cell-mediated cytotoxicity (ADCC) and phagocytosis**  
343 **(ADCP) assays**

344 ADCC activity was assessed in B-cell lymphoma cell lines co-cultured for 4  
345 hours with freshly obtained PBMCs (1:10, target:effector), in the presence of 10  
346 ng/mL TG-1801 +/- U2 dual assets (10 µg/mL ublituximab + 1 µM umbralisib),  
347 using and a LDH release assay (Roche). The ADCC was calculated using the  
348 following formula:

349  $ADCC \text{ percentage} = [(sample \text{ release} - spontaneous \text{ release}) / (maximal \text{ release}$   
350  $- spontaneous \text{ release})] * 100.$

351 Spontaneous release, corresponding to target cells incubated with effector cells  
352 without antibody, was defined as 0% cytotoxicity, with maximal release (target  
353 cells lysed with 1% Triton X-100) defined as 100% cytotoxicity. The average  
354 percentage of ADCC and standard deviations of the triplicates of each  
355 experiment were calculated.

356

357 ADCP activity was assessed in B-cell lymphoma cell lines co-cultured for 4  
358 hours with M1-polarized macrophages (1:5, target:effector), in the presence of  
359 10 ng/mL TG-1801 +/- U2 dual assets (10 µg/mL ublituximab + 1 µM  
360 umbralisib), using and the pHrodo-stained B cells (IncuCyte<sup>®</sup> pHrodo<sup>®</sup> Red Cell  
361 Labelling Kit for Phagocytosis, Sartorius). Following phagocytosis assay, the  
362 non-phagocytosed cells were removed by washing with PBS 2–3 times and  
363 phagocytosis was analysed by fluorescent microscopy (EVOS Cell Imaging  
364 Systems -Thermo-Fisher)

365

366

## 367 **Xenograft mouse model and IHC staining**

368 Eight-week-old NOD/SCID IL2R $\gamma$ -null (NSG) male and female mice (Janvier  
369 Labs, France) were subcutaneously injected with Raji cells and tumour-bearing  
370 mice were randomized using GraphPad Prism 9.0 software and assigned to one  
371 of the following treatment arms (8-6 mice per group): TG-1801 (5 mg/kg, qw),  
372 ublituximab (5 mg/kg, qw), umbralisib (150 mg/kg, bid), ublituximab (5 mg/kg,  
373 qw) + umbralisib (150 mg/kg, bid), TG-1801+ublituximab combo, TG-  
374 1801+umbralisib combo or the triplet (U2 + TG-1801), or an equal volume of  
375 vehicle for 17 days. Tumour volumes were measured each 2-3 days with  
376 external callipers. The number of animals used in each of the experimental  
377 groups is based on the literature and previous results from the group (Ribeiro et  
378 al., 2021). Immunohistochemical staining of representative tumour specimens  
379 (N=3) was performed using anti-CD20 (Sigma), anti-GPR183 (Santa Cruz), anti-  
380 F4/80 (Abcam), anti-Histone H3-pSer10 (Abcam) and anti-CD56/NCAM-1  
381 (Abcam). Preparations were evaluated using an Olympus microscope and  
382 MicroManager software.

383 IHC signal intensity was quantified in at least 5 pictures of two representative  
384 tumour specimens from the Raji xenograft model, using QuPath v.0.2.3  
385 (Queen's University, Belfast, Northern Ireland). Cell detection was conducted as  
386 previously described (Bankhead et al., 2017) using QuPath's built-in "Positive  
387 cell detection" by calculating the per cent of positively stained cells in each field.

388

## 389 **RNA sequencing (RNA-seq) analysis**

390 Two Burkitt lymphoma (BL) cell lines (Daudi and Raji) and two BL primary  
391 samples were co-cultured with bone marrow stromal cells (BMSCs), M2-

392 polarized macrophages and PBMCs (4:1:1:1) in the presence of 10 ng/mL TG-  
393 1801 +/- U2. After 24h incubation, CD20+ target cells were isolated using the  
394 EasySep Human Biotin Positive Selection Kit II (StemCell Technologies,  
395 Canada) and the biotinylated anti-CD20 antibody (BioLegend, CA, USA).  
396 Purified CD20+ cells, together with representative bulk Raji xenografts with >  
397 95% tumour B cells were subjected to RNA-seq analysis according to previous  
398 procedures (Ribeiro et al., 2021). Sequencing data have been deposited at the  
399 Gene Expression Omnibus (GEO) of the National Center for Biotechnology  
400 Information (GSE199413). Volcano plot showing the most relevant significantly  
401 differentially expressed genes between triplet and TG-1801 treatments, with  
402  $|\text{Log}_2 \text{ fold change}| > 1.5$  and  $p\text{-adj value} < 0.01$  (red dots). Grey, green and blue  
403 dots identified genes with insignificant transcriptional and/or statistical variation.  
404 Briefly, the raw fastq RNAseq files of each condition were quality checked and  
405 gene expression was estimated using Salmon software ([https://combine-](https://combine-lab.github.io/salmon/)  
406 [lab.github.io/salmon/](https://combine-lab.github.io/salmon/)). Differential expression analysis was then carried out  
407 using the negative binomial distribution (DESeq2 software,  
408 <https://bioconductor.org/packages/release/bioc/html/DESeq2.html>), accounting  
409 for and filtering the effects of the respective controls.  
410 Purified CD20+ cells, together with representative Raji xenografts were  
411 subjected to RNA extraction and qPCR validation. Briefly, total RNA was  
412 extracted using TRIZOL (Thermo Fisher) following manufacturer's instructions.  
413 One microgram of RNA was retrotranscribed to complementary DNA using  
414 moloney murine leukemia virus reverse transcriptase (Thermo Fisher) and  
415 random hexamer primers (Roche). mRNA expression was analyzed in duplicate  
416 by quantitative real-time PCR and the relative expression of each gene was

417 quantified by the comparative cycle threshold method ( $\Delta\Delta C_t$ )  $\beta$ -actin (Fw:  
418 GACGACATGGAGAAAATCTG, Rv: ATGATCTGGGTCATCTTCTC) were used  
419 as an endogenous control. The sequences used for the primers are the  
420 following GPR183 (Fw: GACTGGAGAATCGGAGATGC, Rv:  
421 CAGCAATGAAGCGGTCAATA), CCL20 (Fw: CCAATGAAGGCTGTGACATCA,  
422 Rv: AGTCTGTTTTGGATTTGCGCA), IL8 (Fw: AAGGAAAAGTGGGTGCAGAG,  
423 Rv: GCTTGAAGTTTCACTGGCATC), CD68 (Fw:  
424 CCTCCAGCAGAAGGTTGTCT, Rv: CGAAGGGATGCATTCTGAGC), CCL4  
425 (Fw: TTCCTCGCAACTTTGTGGTA, Rv: GCTTGCTTCTTTTGGTTTGG), CCL7  
426 (Fw: TGG AGA GCTACAGAAGGACCA, Rv: GGGTCAGCACAGATCTCCTT),  
427 CXCL1 (Fw: CATCCAAAGTGTGAACGTGAA, Rv:  
428 CTATGGGGGATGCAGGATT), CXCL3, (Fw:  
429 CAAAGTGTGAATGTAAGGTCCCC, Rv: CGGGGTTGAGACAAGCTTTC) and  
430 CXCL10 (Fw: CCTGCAAGCCAATTTTGTCCA, Rv:  
431 TGGCCTTCGATTCTGGATTCA).

432

### 433 **Generation of Raji-GPR183<sup>KO</sup> cells**

434 The generation of a CRISPR-Cas9 gene-editing tool was employed to edit the  
435 Raji parental cells line to create GPR183 knockout.  $0.5 \times 10^6$  cells were  
436 electroporated on a Nucleofector II device (program A032, Lonza) with 36 pmol  
437 SpCas9 Nuclease V3, 44 pmol CRISPR-Cas9 tracrRNA ATTO 550, 44 pmol Alt-  
438 R CRISPR-Cas9 crRNA Hs.Cas9.GPR183.1.AA (GPR183<sup>KO</sup> 5'-  
439 CAATGAAGCGGTCAATACTC AGG -3') (IDT-Integrated DNA Technologies).  
440 GPR183<sup>KO</sup> cells were resuspended in 96-well plates with a limiting dilution of

441 0.3 cells per well. The GPR183<sup>KO</sup> biallelic clones were confirmed by Sanger  
442 Sequencing and western blot. Raji-GPR183<sup>KO</sup> is available upon request.

443

#### 444 **Western blot analysis**

445 Total protein extracts were obtained from cell lines and tumour specimens using  
446 RIPA (Sigma-Aldrich) buffer and subjected to SDS-PAGE. Membrane-  
447 transferred proteins were revealed by incubating with primary and secondary  
448 antibodies followed by chemiluminescence detection using the ECL system  
449 (Pierce) and a Fusion FX imaging system (Vilber Lourmat). Band intensity was  
450 quantified using Image J software and normalized to housekeeping protein  
451 (GAPDH). Values were referred to the indicated control and added below the  
452 corresponding band. If not otherwise specified, representative data from N = 2  
453 experiments are shown.

454

#### 455 **3D multicellular spheroid generation**

456 One hundred thousand Raji-GPR183<sup>WT</sup> or Raji-GPR183<sup>KO</sup> cells were then  
457 stained with Hoechst 33342 blue dye (Invitrogen) and cultivated in a conditional  
458 medium with 25,000 StromaNKtert-GFP cells for 2 days to generate the BL 3D  
459 spheroids. Then, 25,000 M1-macrophages were stained with PKH26  
460 red-fluorescent dye and added to 3D spheroid in presence or absence of 10  
461 ng/mL TG-1801 +/- U2 (10 µg/mL ublituximab + 1 µM umbralisib) for one more  
462 day. The M1-macrophages infiltration was evaluated by live-cell red  
463 fluorescence at EVOS Cell Imaging Systems (Thermo-Fisher).

464

#### 465 **Transwell migration assay and F-actin staining**

466 Briefly, Raji-GPR183<sup>WT</sup>, Raji-GPR183<sup>KO</sup> and Raji parental cells exposed to the  
467 GPR183 inhibitor NIBR189 (Sigma-Aldrich, Germany) were cultured for 1 h in  
468 culture medium not containing foetal bovine serum but supplemented with 0.5%  
469 bovine serum albumin (Sigma-Aldrich), in the presence or absence of 10 ng/mL  
470 TG-1801 +/- U2 combination, and analysed for CXCL12-dependent chemotaxis,  
471 as previously described (Balsas et al., 2017). Values were referred to cells  
472 cultured without CXCL12. F-actin levels were assessed after exposure to TG-  
473 1801 +/- U2, followed by staining with a TRITC-labelled phalloidin and direct red  
474 fluorescence recording.

#### 475 **Ethical issues**

476  
477 Animals were handled following protocols approved by the Animal Ethics  
478 Committee of the University of Barcelona (registry num. 38/18).

479 Institutional Review Board approvals for the study protocol (ref PI-20-040),  
480 amendments, and written informed consent documents from BL patients and  
481 healthy donors were obtained prior to study initiation. Study procedures were  
482 conducted in accordance with the Declaration of Helsinki. Buffy coats were  
483 provided by the Blood and Tissue Bank of Catalonia (agreement NE-A1-IJC).

484

#### 485 **Statistical analysis**

486  
487 Presented data are the mean  $\pm$  SD or SEM of 3 independent experiments. All  
488 statistical analyses were done by using GraphPad Prism 9.0 software  
489 (GraphPad Software). Comparison between 2 groups of samples was evaluated  
490 by nonparametric Mann–Whitney test to determine how the response is affected



491 by 2 factors. Pearson test was used to assess the statistical significance of  
492 correlation. Results were considered statistically significant when  $p$ -value <  
493 0.05.

494

495 **Acknowledgments:** We are very grateful to Salvador Sánchez Vincés, at Sao  
496 Francisco University/Brazil for his precious help on bioinformatic. This study  
497 was financially supported by TG Therapeutics, Fondo de Investigación Sanitaria  
498 PI18/01383, European Regional Development Fund (ERDF) “Una manera de  
499 hacer Europa” (to GR). JCS and MFS were recipients of a Sara Borrell research  
500 contract (CD19/00228) and a predoctoral fellowship (FI19/00338) from Instituto  
501 de Salud Carlos III, respectively. MA was a fellow of PROTEOblood, a project  
502 co-financed by the European Regional Development Fund (ERDF) through the  
503 Interreg V-A Spain-France-Andorra (POCTEFA) program (EFA360/19). This  
504 work was carried out under the CERCA Program (Generalitat de Catalunya).

505

506 **Competing Interests:** H. Miskin reports personal fees from TG Therapeutics,  
507 Inc. during the conduct of the study. E. Normant reports employment and  
508 ownership of stock with TG Therapeutics. G. Roué reports grants from TG  
509 Therapeutics and Instituto de Salud Carlos III during the conduct of the study.  
510 The remaining authors have no competing financial interests.

511

## 512 REFERENCES

513 Armengol M, Santos JC, Fernández-Serrano M, Profitós-Pelejà N, Ribeiro ML,  
514 Roué G. 2021. Immune-Checkpoint Inhibitors in B-Cell Lymphoma.

- 515 *Cancers (Basel)* **13**:1–41. doi:10.3390/CANCERS13020214
- 516 Balsas P, Esteve-Arenys A, Roldán J, Jiménez L, Rodríguez V, Valero JG,  
517 Chamorro-Jorganes A, De La Bellacasa RP, Teixidó J, Matas-Céspedes A,  
518 Moros A, Martínez A, Campo E, Sáez-Borderías A, Borrell JI, Pérez-Galán  
519 P, Colomer D, Roué G. 2017. Activity of the novel BCR kinase inhibitor  
520 IQS019 in preclinical models of B-cell non-Hodgkin lymphoma. *J Hematol*  
521 *Oncol* **10**. doi:10.1186/s13045-017-0447-6
- 522 Bankhead P, Loughrey MB, Fernández JA, Dombrowski Y, McArt DG, Dunne  
523 PD, McQuaid S, Gray RT, Murray LJ, Coleman HG, James JA, Salto-Tellez  
524 M, Hamilton PW. 2017. QuPath: Open source software for digital pathology  
525 image analysis. *Sci Rep* **7**. doi:10.1038/S41598-017-17204-5
- 526 Barbier S, Chatre L, Bras M, Sancho P, Roué G, Virely C, Yuste V, Baudet S,  
527 Rubio M, Esquerda J, Sarfati M, Merle-Béral H, Susin S. 2009. Caspase-  
528 independent type III programmed cell death in chronic lymphocytic  
529 leukemia: the key role of the F-actin cytoskeleton. *Haematologica* **94**:507–  
530 517. doi:10.3324/HAEMATOL.13690
- 531 Barclay A, Van den Berg T. 2014. The interaction between signal regulatory  
532 protein alpha (SIRPα) and CD47: structure, function, and therapeutic  
533 target. *Annu Rev Immunol* **32**:25–50. doi:10.1146/ANNUREV-IMMUNOL-  
534 032713-120142
- 535 Barroso R, Martínez Muñoz L, Barrondo S, Vega B, Holgado BL, Lucas P,  
536 Baíllo A, Sallés J, Rodríguez-Frade JM, Mellado M. 2012. EBI2 regulates  
537 CXCL13-mediated responses by heterodimerization with CXCR5. *FASEB J*

538 **26**:4841–4854. doi:10.1096/FJ.12-208876

539 Buatois V, Johnson Z, Salgado-Pires S, Papaioannou A, Hatterer E, Chauchet  
540 X, Richard F, Barba L, Daubeuf B, Cons L, Broyer L, D’Asaro M, Matthes  
541 T, LeGallou S, Fest T, Tarte K, Clarke Hinojosa RK, Ferrer EG, Ribera JM,  
542 Dey A, Bailey K, Fielding AK, Eissenberg L, Ritchey J, Rettig M, DiPersio  
543 JF, Kosco-Vilbois MH, Masternak K, Fischer N, Shang L, Ferlin WG. 2018.  
544 Preclinical development of a bispecific antibody that safely and effectively  
545 targets CD19 and CD47 for the treatment of B-cell lymphoma and  
546 leukemia. *Mol Cancer Ther*. doi:10.1158/1535-7163.MCT-17-1095

547 Dlouhy I, Armengol M, Recasens-Zorzo C, Ribeiro ML, Pérez-Galán P, Bosch  
548 F, López-Guillermo A, Roué G. 2020. Interleukin-1 receptor associated  
549 kinase 1/4 and bromodomain and extraterminal inhibitions converge on NF-  
550 κB blockade and display synergistic antitumoral activity in activated B-cell  
551 subset of diffuse large B-cell lymphoma with *MYD88<sup>L265P</sup>*.  
552 *Haematologica* **106**. doi:10.3324/HAEMATOL.2020.278258

553 Gessier F, Preuss I, Yin H, Rosenkilde MM, Laurent S, Endres R, Chen YA,  
554 Marsilje TH, Seuwen K, Nguyen DG, Sailer AW. 2014. Identification and  
555 Characterization of Small Molecule Modulators of the Epstein–Barr Virus-  
556 Induced Gene 2 (EBI2) Receptor. *J Med Chem* **57**:3358–3368.  
557 doi:10.1021/JM4019355

558 Hatterer E, Chauchet X, Richard F, Barba L, Moine V, Chatel L, Broyer L,  
559 Pontini G, Bautzova T, Juan F, Calloud S, Bosson N, Charreton M,  
560 Masternak K, Buatois V, Shang L. 2020. Targeting a membrane-proximal

- 561 epitope on mesothelin increases the tumoricidal activity of a bispecific  
562 antibody blocking CD47 on mesothelin-positive tumors. *MAbs* **12**.  
563 doi:10.1080/19420862.2020.1739408
- 564 Liu C, Yang X V., Wu J, Kuei C, Mani NS, Zhang L, Yu J, Sutton SW, Qin N,  
565 Banie H, Karlsson L, Sun S, Lovenberg TW. 2011. Oxysterols direct B-cell  
566 migration through EBI2. *Nat 2011 4757357* **475**:519–523.  
567 doi:10.1038/nature10226
- 568 Lunning M, Vose J, Nastoupil L, Fowler N, Burger JA, Wierda WG, Schreeder  
569 MT, Siddiqi T, Flowers CR, Cohen JB, Sportelli P, Miskin HP, Weiss MS,  
570 O'Brien S. 2019. Ublituximab and umbralisib in relapsed/refractory B-cell  
571 non-Hodgkin lymphoma and chronic lymphocytic leukemia. *Blood*  
572 **134**:1811–1820. doi:10.1182/blood.2019002118
- 573 Mateo V, Lagneaux L, Bron D, Biron G, Armant M, Delespesse G, Sarfati M.  
574 1999. CD47 ligation induces caspase-independent cell death in chronic  
575 lymphocytic leukemia. *Nat Med 1999 511* **5**:1277–1284. doi:10.1038/15233
- 576 Matlung HL, Szilagyi K, Barclay NA, van den Berg TK. 2017. The CD47-SIRP $\alpha$   
577 signaling axis as an innate immune checkpoint in cancer. *Immunol Rev*.  
578 doi:10.1111/imr.12527
- 579 Pereira JP, Kelly LM, Xu Y, Cyster JG. 2009. EBV induced molecule-2 mediates  
580 B cell segregation between outer and center follicle. *Nature* **460**:1122.  
581 doi:10.1038/NATURE08226
- 582 Ribeiro ML, Reyes-Garau D, Vinyoles M, Profitós Pelejà N, Santos JC,  
583 Armengol M, Fernández-Serrano M, Sedó Mor A, Bech-Serra JJ, Bleuca P,

584 Musulen E, De La Torre C, Miskin H, Esteller M, Bosch F, Menéndez P,  
585 Normant E, Roué G. 2021. Antitumor Activity of the Novel BTK Inhibitor  
586 TG-1701 Is Associated with Disruption of Ikaros Signaling in Patients with  
587 B-cell Non–Hodgkin Lymphoma. *Clin Cancer Res* **5**:13. doi:10.1158/1078-  
588 0432.ccr-21-1067

589 Souza GR, Molina JR, Raphael RM, Ozawa MG, Stark DJ, Levin CS, Bronk LF,  
590 Ananta JS, Mandelin J, Georgescu M-M, Bankson JA, Gelovani JG, Killian  
591 TC, Arap W, Pasqualini R. 2010. Three-dimensional tissue culture based  
592 on magnetic cell levitation. *Nat Nanotechnol* 2010 **54** **5**:291–296.  
593 doi:10.1038/nnano.2010.23

594

## Figure 1- figure supplement

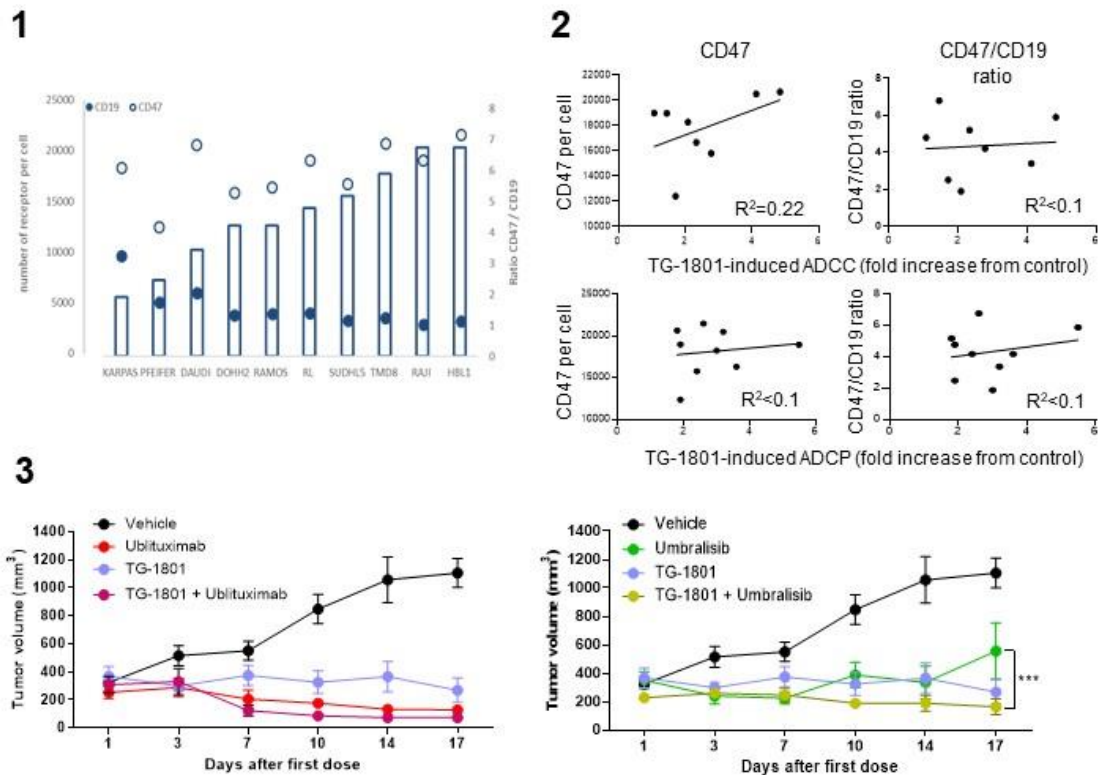

### Figure 1- figure supplement legend

1) Cytofluorimetric quantification of CD47 and CD19 levels in a panel of 10 B-NH cell lines. 2) CD47 and CD19 expression levels, as well as their ratios, were plotted against the corresponding phagocytosis and ADCC quantification for each cell line described in 1), and the correlation coefficient was calculated using GraphPad Prism software. 3) NSG mice were subcutaneously injected with Raji cells and tumour-bearing animals were randomly assigned to one of the following treatment arms (8-6 mice per group): TG-1801 (5 mg/kg, qw), ublituximab (5 mg/kg, qw), umbralisib (150 mg/kg, bid), TG-1801+ublituximab combo (left panel) or TG-1801+umbralisib combo (right panel), or an equal volume of vehicle, for 17 days. Tumour volumes were recorded each 2-3 days using external callipers. \*\*\*\*  $p<0.001$ .

# Figure 1

**A**

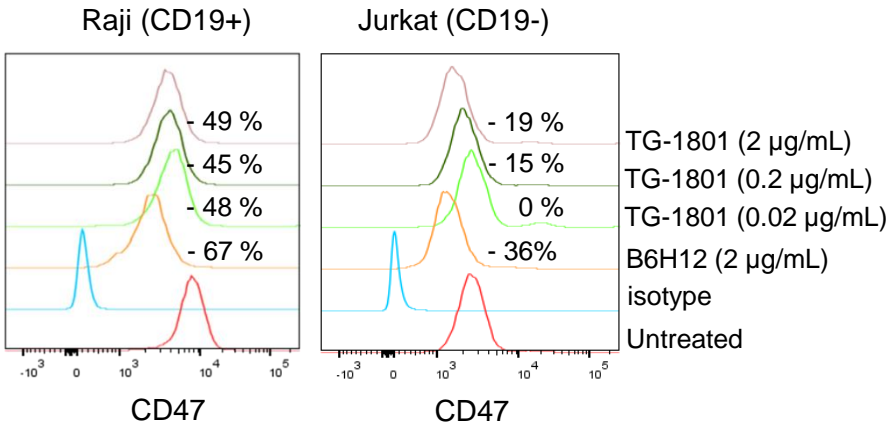

**B**

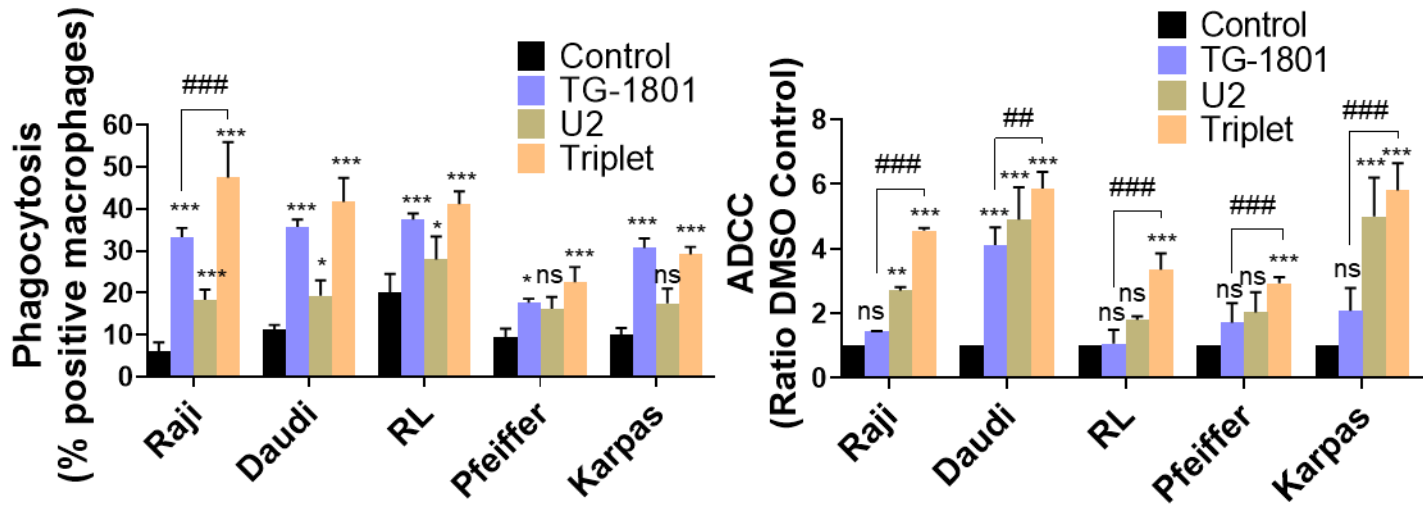

**C**

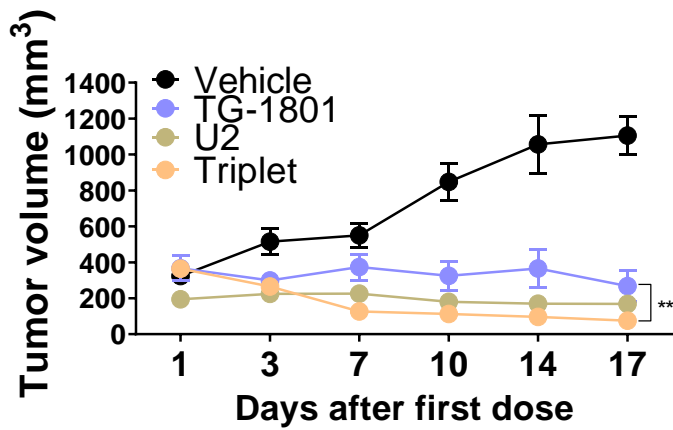

**D**

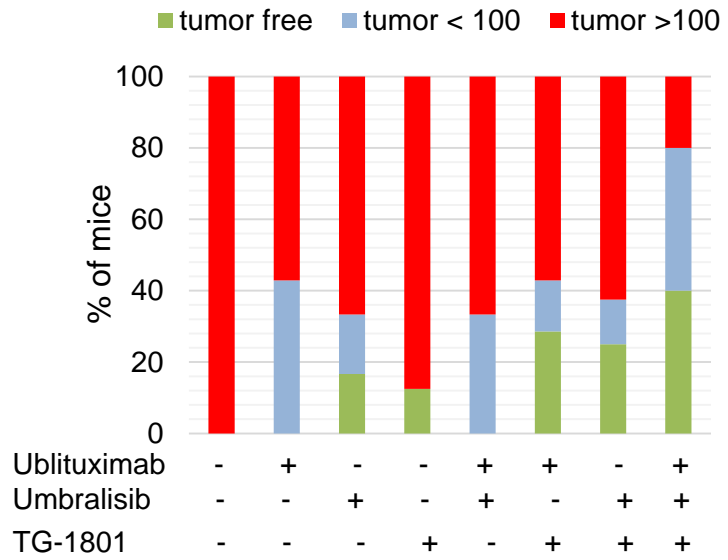

# Figure 2

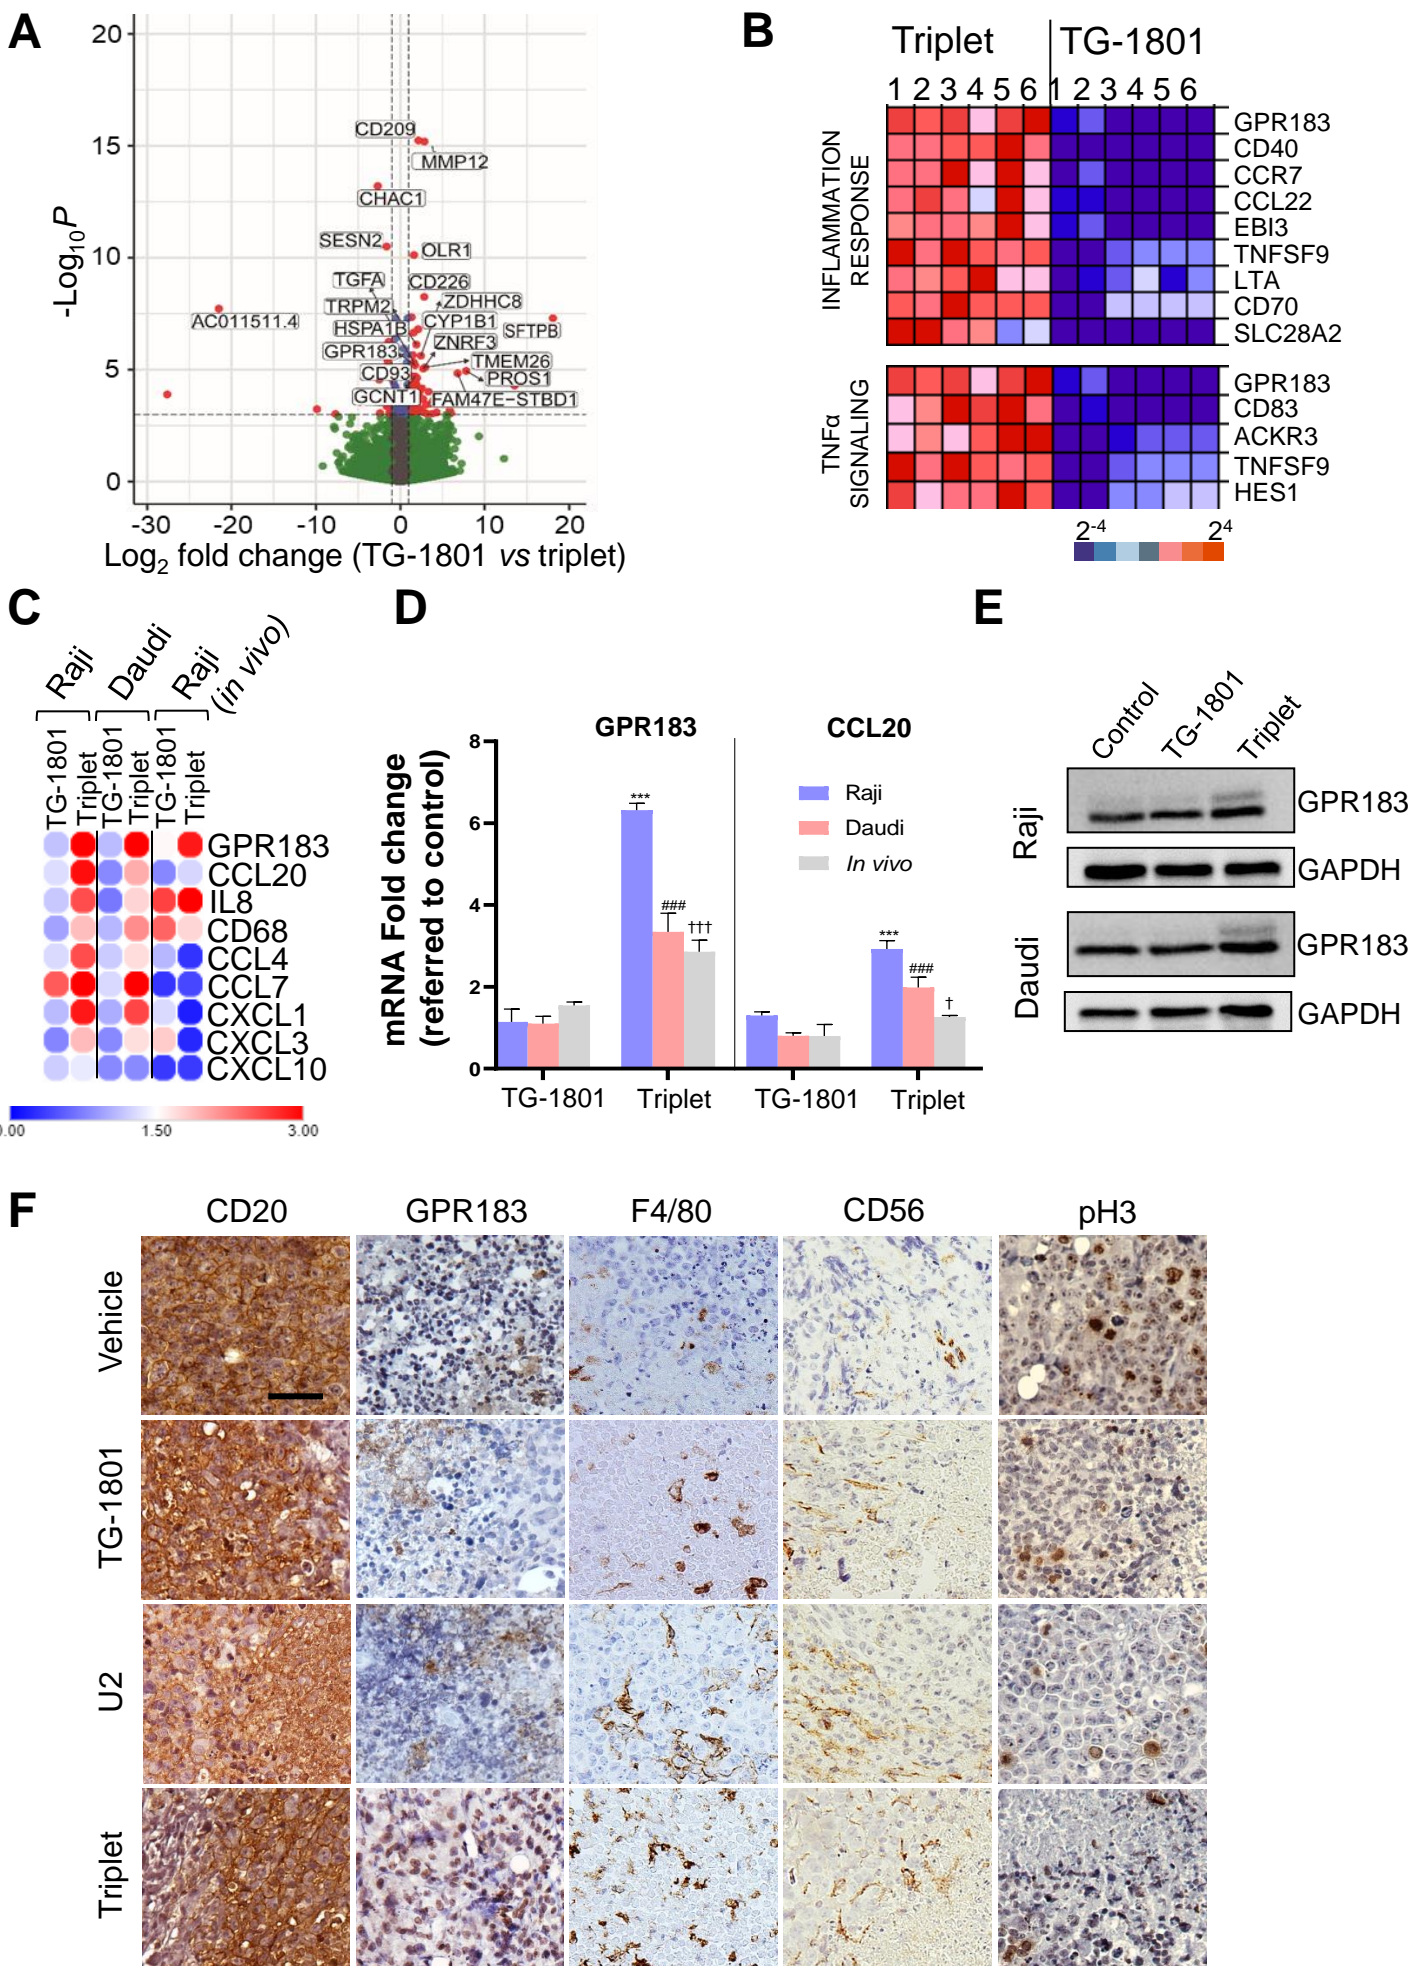



# Figure 3

**A**

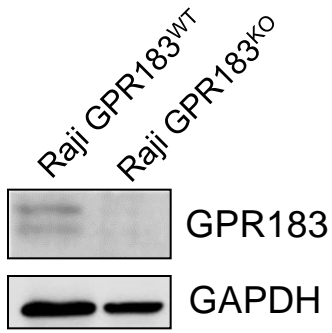

**B**

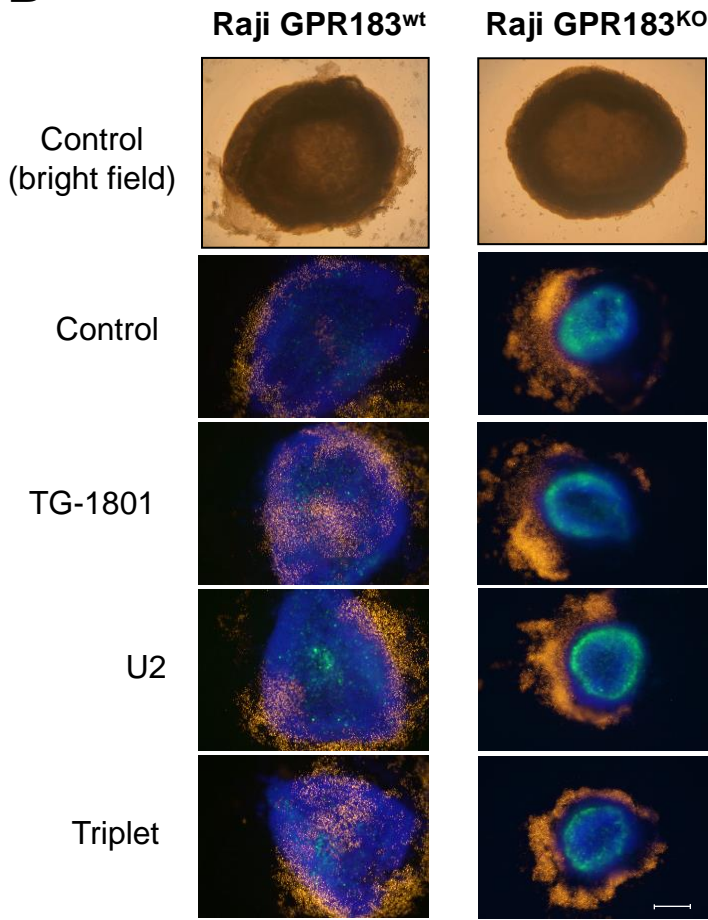

**C**

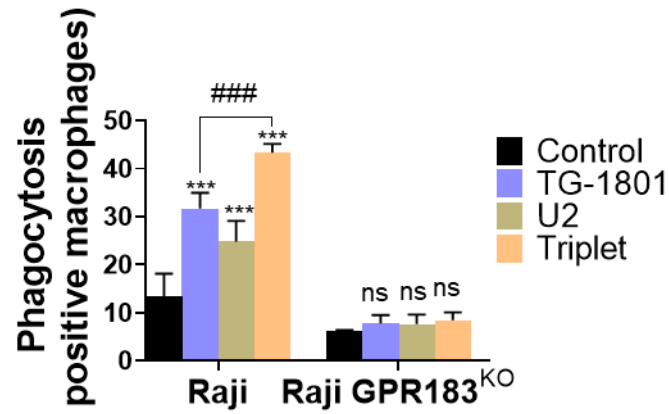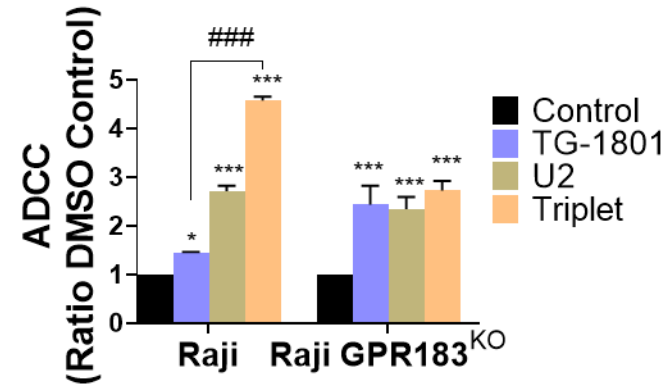

**D**

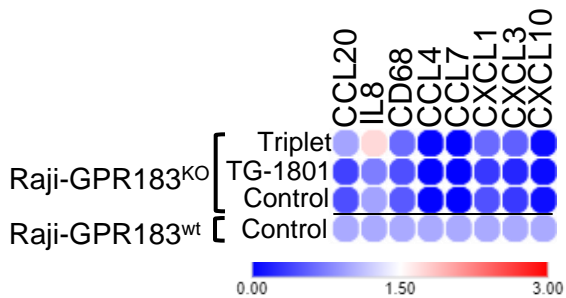

**E**

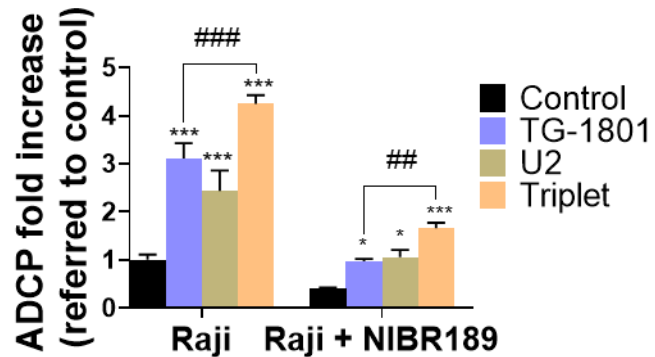

# Figure 3 (cont.)

**F**

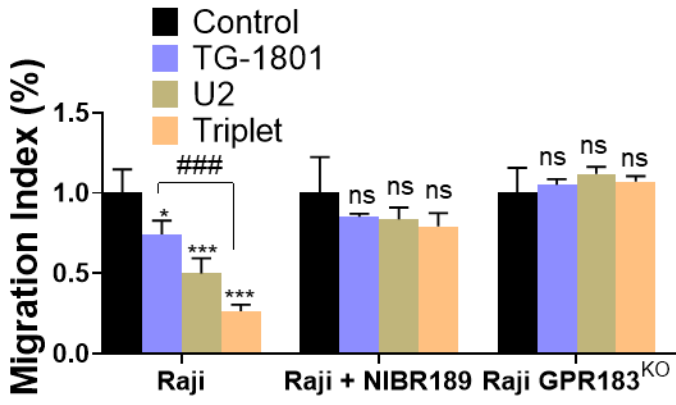

**H**

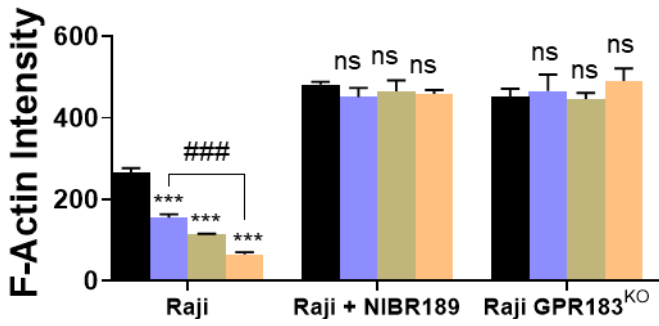

**G**

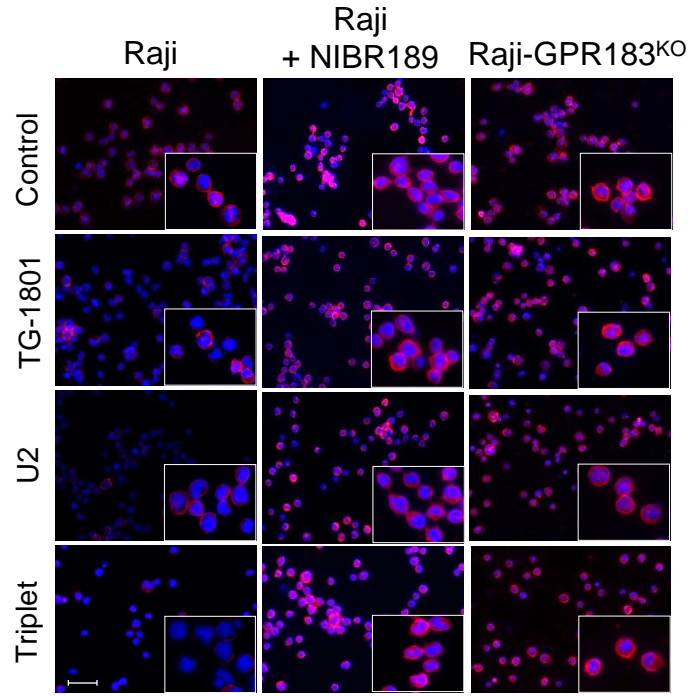

**I**

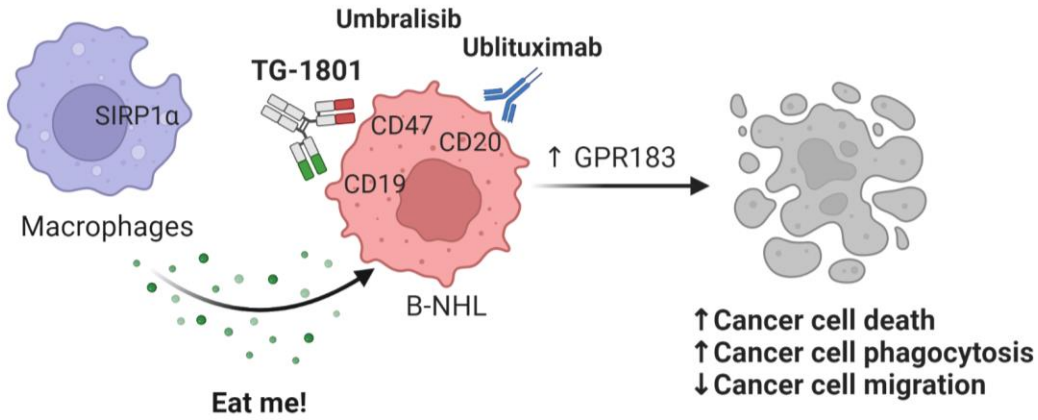

Source: https://www.biorxiv.org/content/10.1101/2022.03.31.486558v1.full.pdf
